# Supplementary material for: Enhancing the Catalytic Activity of Type II L-Asparaginase from Bacillus licheniformis through Semi-Rational Design
Source: MDPI journal article supplement (doi:10.3390/ijms23179663), 2022-08-26
Supplement: s1 [file s1]

## Supplementary Material

Table S1. Primers used in this study.

| Residue Sites | Name   | Primer (5'-3')                                   |
|---------------|--------|--------------------------------------------------|
| L203          | L203-F | GGTGGTGM <u>MNN</u> AATGACCGGATTGCTGCGGCAA       |
|               | L203-R | GGTCATT <u>NNK</u> CACCACCATGGTTCCTTTCCCG        |
| K218          | K218-F | ACCCATM <u>NN</u> ACAGCTCCTGACACTTTCAAGTCG       |
|               | K218-R | GGAGCTGT <u>NNK</u> ATGGGTTTTTCGTACATATCTTGC     |
| T223          | T223-F | CAGCTCCTGACM <u>NN</u> TTCAAGTCGGAAGAAATGGGG     |
|               | T223-R | GA <u>NNK</u> GTCAGGAGCTGTCGTATGGGTTTTCG         |
| T325          | T325-F | TCTACACGCM <u>NN</u> GGCAGCGGGGTTGTACGCC         |
|               | T325-R | CTGCC <u>NNK</u> GCGTGTAGAACGCACGACTGCCGC        |
| A180          | A180-F | CGGGCCTM <u>NN</u> AACTTGTACAATGCTGTAAAGGTCG     |
|               | A180-R | ACAAGTT <u>NNK</u> AGGCCCCGTCGGCTCCAATCGCT       |
| E102/R123     | E102-F | CAGTGGAM <u>NN</u> CAAGTGGCAAACATCGGAAGTC        |
|               | E102-R | CCACTTG <u>NNK</u> TCCACTGATATTCGCGATATCCT       |
|               | R123-F | GAGCAAGM <u>NN</u> ACTGCGAAGCTTTTAGCTTCAGA       |
|               | R123-R | TCGCAGT <u>NNK</u> CTTGCTCAATTCAGGAGCGTT         |
| V104/R57      | V104-F | GTGGAGAACAAM <u>NN</u> NGCAAACATCGGAAGTCAGAATATG |
|               | V104-R | TGC <u>NNK</u> TTGTTCTCCACTGATATTCGCGATAT        |
|               | R57-F  | GCCCAACATAM <u>NN</u> ATTTTGGCTACAGGGGGGAC       |
|               | R57-R  | AAAT <u>NNK</u> TATGTTGGGCAGACGGTCATTTCTT        |

**Notes:** The underlines represented the mutation sites; N indicated any of the following A, T, G, or C; K indicated G or T; M indicated A or C.

**Table S2. Enzymatic activity and specific activity of the wild-type and positive mutants.**

| <b>Enzymes</b>          | <b>Enzymatic Activity (IU/ml)</b> | <b>Specific activity (IU/mg)</b> |
|-------------------------|-----------------------------------|----------------------------------|
| WT                      | 14.78±1.43                        | 198.40±2.92                      |
| E102I/V104L             | 41.24±2.36                        | 486.83±9.52                      |
| E102I/A180R             | 40.40±3.45                        | 426.15±12.64                     |
| E102I/T223A             | 41.43±1.77                        | 454.21±19.32                     |
| E102I/T325C             | 39.46±2.59                        | 517.76±13.92                     |
| V104L/A180R             | 39.37±2.88                        | 432.57±16.88                     |
| V104L/T223A             | 33.26±3.96                        | 418.35±7.44                      |
| V104L/T325C             | 45.37±3.36                        | 430.99±8.64                      |
| A180R/T223A             | 47.44±2.56                        | 479.11±17.68                     |
| A180R/T325C             | 41.68±3.59                        | 313.98±7.28                      |
| T223A/T325C             | 36.54±2.97                        | 355.51±13.76                     |
| E102I/T223A/T325C       | 51.73±6.39                        | 705.45±15.21                     |
| E102I/T223A/A180R       | 35.57±1.84                        | 480.61±5.84                      |
| A180R/T223A/E102I       | 36.69±5.76                        | 522.93±13.75                     |
| A180R/T223A/T325C       | 39.57±2.71                        | 646.54±9.91                      |
| E102I/A180R/T223A/T325C | 53.74±5.71                        | 760.64±19.40                     |
| E102I/V104L/T223A/T325C | 55.29±4.44                        | 812.32±19.07                     |
| V104L/A180R/T223A/T325C | 55.47±7.23                        | 794.75±11.5                      |
| E102I/A180R/T223A/T325C | 53.74±5.71                        | 790.61±17.95                     |
